# Supplementary material for: Non-thermal plasma catalysis driven sustainable pyrolysis oil upgrading to jet fuel under near-ambient conditions
Source: Royal Society of Chemistry journal article supplement (doi:10.1039/d3ey00309d), 2024-01-01
Supplement: d3ey00309d1.pdf [file d3ey00309d1.pdf]

Supporting information for

# Non-thermal Plasma Catalysis Driven Sustainable Pyrolysis Oil Upgrading to Jet Fuel at Near Ambient Conditions

Hoang M.Nguyen,<sup>a</sup> Ali Omidkar,<sup>a</sup> Wenping Li,<sup>a</sup> Zhaofe Li,<sup>a</sup> Hua Song<sup>\*a</sup>

<sup>a</sup>Green Catalysis Research Group, Department of Chemical and Petroleum Engineering,  
University of Calgary, 2500 University Dr NW, Calgary, AB T2N 1N4, Canada.

Corresponding author:

E-mail address: [sonh@ucalgary.ca](mailto:sonh@ucalgary.ca) (Prof. Hua Song).

## Table of content of supporting information

| Supporting Information                                                                                                                                                                                                    | Page |
|---------------------------------------------------------------------------------------------------------------------------------------------------------------------------------------------------------------------------|------|
| Calculation details                                                                                                                                                                                                       | 3    |
| <b>Supplementary Figures</b>                                                                                                                                                                                              |      |
| <b>Fig.S1.</b> Schematic diagram of triphase plasma catalytic driven pyrolysis oil upgrading to jet fuel.                                                                                                                 | 4    |
| <b>Fig.S2.</b> Effects of Ir catalyst loadings on the product yield.                                                                                                                                                      | 5    |
| <b>Fig.S3.</b> Effects of Ir catalyst loadings on the relative distribution of products.                                                                                                                                  | 6    |
| <b>Fig.S4.</b> Containers of feed and upgraded oils produced from different triphase plasma driven reactions. [Reactions conditions: Plasma power: 12W; CH <sub>4</sub> flowrate of 100 cm <sup>3</sup> min <sup>-1</sup> | 9    |

<sup>1</sup>; oil flowrate: 0.05 cm<sup>3</sup> min<sup>-1</sup>].

|                                                                                                     |    |
|-----------------------------------------------------------------------------------------------------|----|
| <b>Fig.S5.</b> Effects of feed oil flowrates on the product yields.                                 | 10 |
| <b>Fig.S6.</b> Effects of feed oil flowrates on the relative distribution of products.              | 11 |
| <b>Fig.S7.</b> TGA profile of spent GaN and Ir/GaN catalysts.                                       | 18 |
| <b>Fig.S8.</b> Voltage-Current profile of plasma discharge inside triphase pyrolysis oil upgrading. | 19 |
| <b>Fig.S9.</b> Possible structure and adsorption of CH and H species on the GaN (110) surface.      | 20 |

### Supplementary Tables

|                                                                                                                                               |    |
|-----------------------------------------------------------------------------------------------------------------------------------------------|----|
| <b>Table S1.</b> Textural properties of the GaN, fresh and spent Ir/GaN samples.                                                              | 7  |
| <b>Table S2.</b> Molecular weight of feed and upgraded oils.                                                                                  | 8  |
| <b>Table S3.</b> Adsorption energy diagram for CH <sub>4</sub> dissociation on the GaN (110) and Ir (100) under plasma regime.                | 12 |
| <b>Table S4.</b> Comparison of upgrading heavy hydrocarbons to jet fuel range hydrocarbons between thermal catalytic processes and this work. | 21 |

## Calculation details

Methane conversion:

$$CH_4 = 1 - \frac{mol_{CH_4}^{out}}{mol_{CH_4}^{in}} \times 100\%$$

Where,  $mol_{CH_4}^{in}$  and  $mol_{CH_4}^{out}$  are the input and output mole of  $CH_4$  (mol), respectively.

Mass balance and product yields:

$$Total\ mass\ balance = \frac{\sum_{mass} (gas + liquid + solid_{after\ reaction})}{\sum_{mass} (gas + liquid + solid_{before\ reaction})} \times 100\%$$

$$Liquid\ Yield\ (\%) = \frac{Mass\ of\ producted\ liquid\ (g)}{Mass\ of\ CH_4(g) + Mass\ of\ feed\ oil\ (g)} \times 100\%$$

$$Mass\ of\ coke\ (\%) = \frac{Mass\ of\ coke}{Mass\ of\ inlet\ CH_4(g) + Mass\ of\ feed\ oil\ (g)} \times 100\%$$

$$Gas\ Yield\ (\%) = 100 - Liquid\ yield\ (\%) - coke\ yield\ (\%)$$

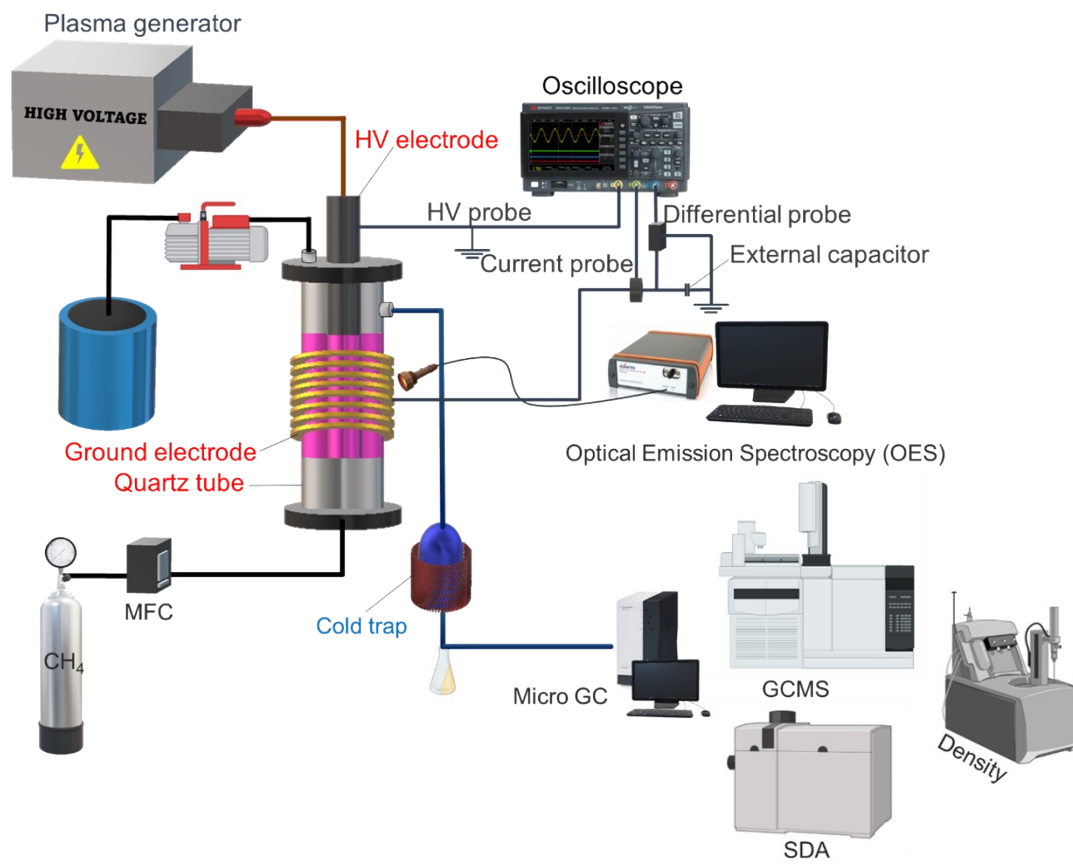

**Fig.S1.** Schematic diagram of triphase plasma catalytic driven pyrolysis oil upgrading to jet fuel.

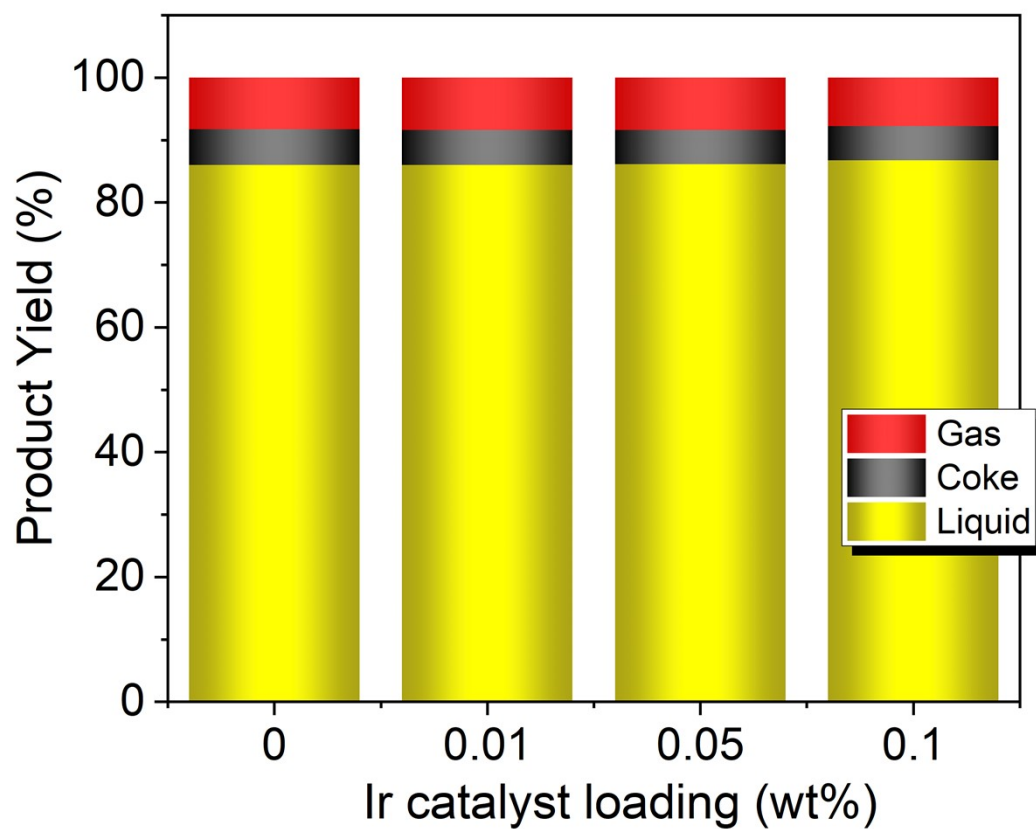

**Fig.S2.** Effects of Ir catalyst loadings on the product yields.

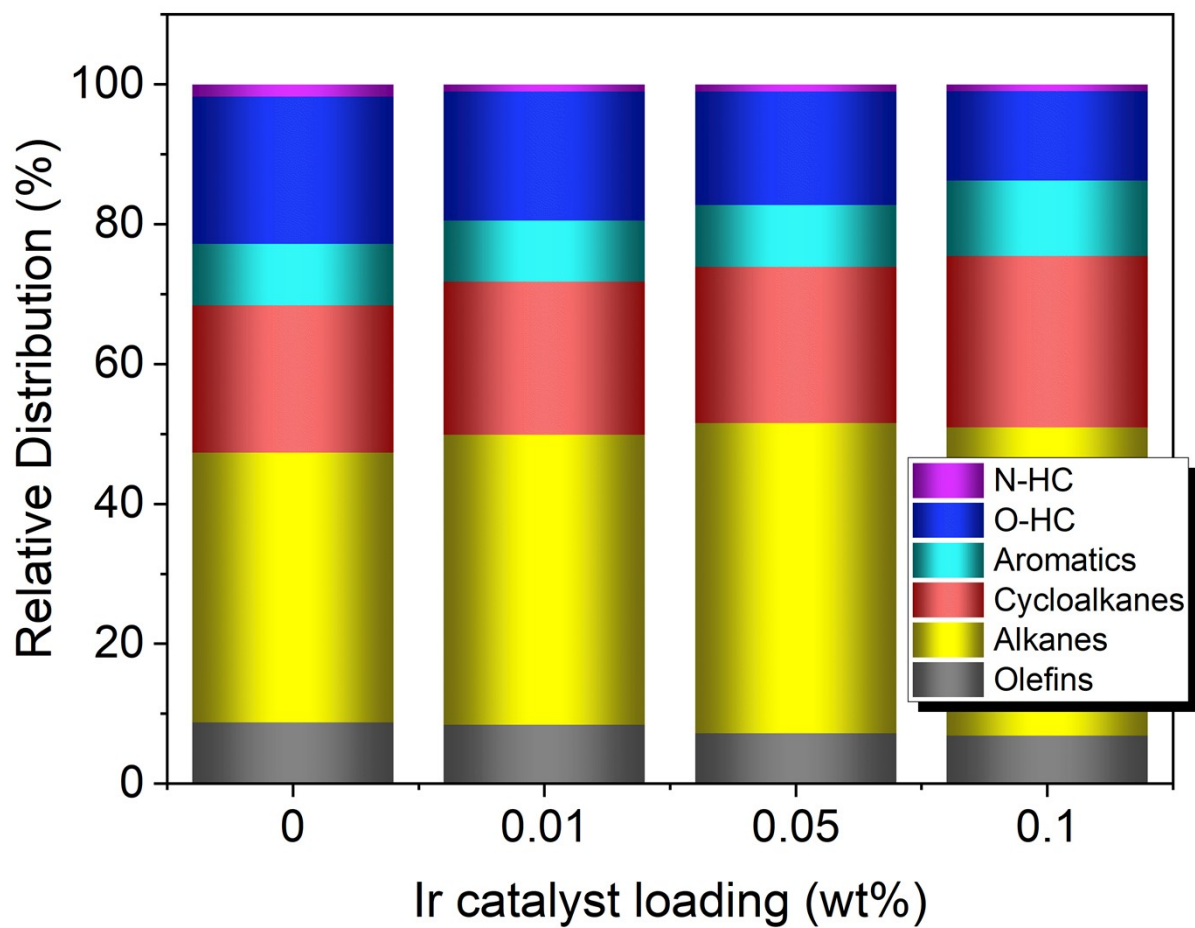

**Fig.S3.** Effects of Ir catalyst loadings on the relative distribution of products.

**Table S1.** Textural properties of the GaN, fresh and spent Ir/GaN samples.

| <b>Catalyst</b> | <b>BET Surface Area<br/>(m<sup>2</sup> g<sup>-1</sup>)</b> | <b>Pore Volume<br/>(cm<sup>3</sup>g<sup>-1</sup>)</b> | <b>Pore Size<br/>(nm)</b> |
|-----------------|------------------------------------------------------------|-------------------------------------------------------|---------------------------|
| GaN             | 8.0                                                        | 0.031                                                 | 19.0                      |
| Fresh Ir-GaN    | 14.6                                                       | 0.052                                                 | 14.5                      |
| Spent Ir-GaN    | 23.1                                                       | 0.098                                                 | 11.8                      |

**Table S2.** Molecular weight of feed and upgraded oils.

| <b>Oil</b>               | <b>Molecular weight (g mol<sup>-1</sup>)</b> |
|--------------------------|----------------------------------------------|
| Feed                     | 210.0                                        |
| Upgraded with Empty tube | 181.2                                        |
| Upgraded with GaN        | 171.2                                        |
| Upgraded with Ir/GaN     | 165.6                                        |



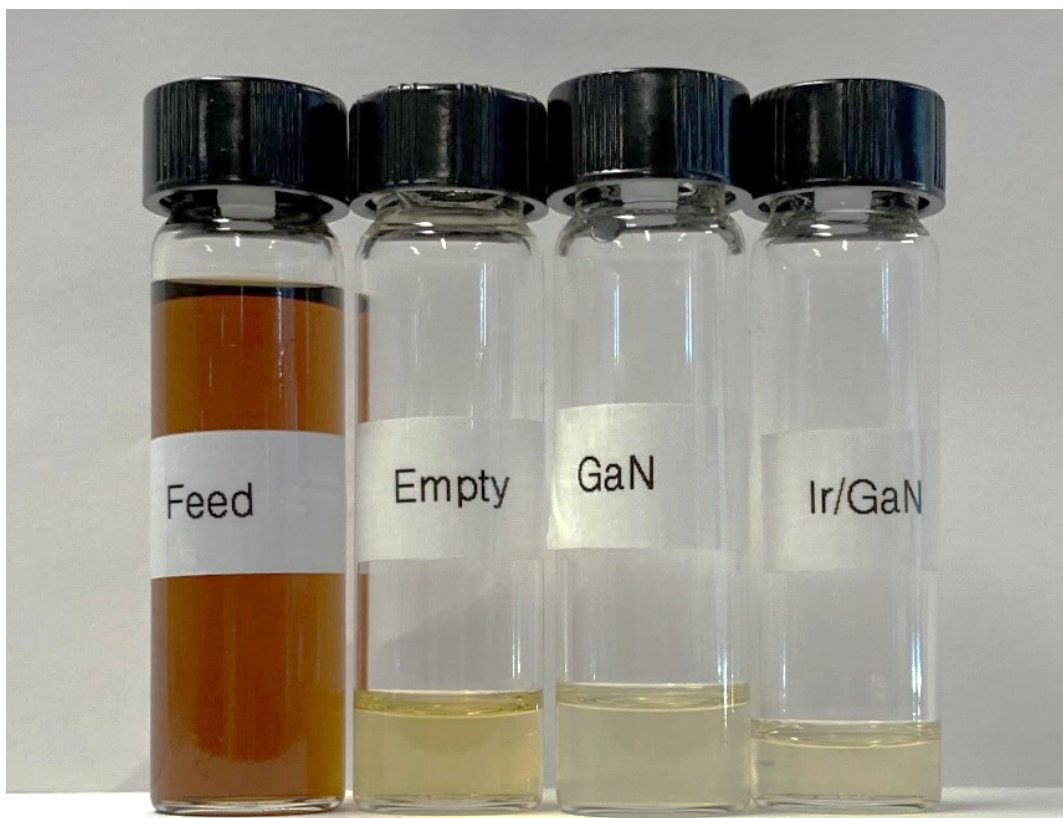

**Fig.S4.** Containers of feed and upgraded oils produced from different triphase plasma driven reactions. [Reactions conditions: Plasma power: 12W; CH<sub>4</sub> flowrate of 100 cm<sup>3</sup> min<sup>-1</sup>; oil flowrate: 0.05 cm<sup>3</sup> min<sup>-1</sup>].

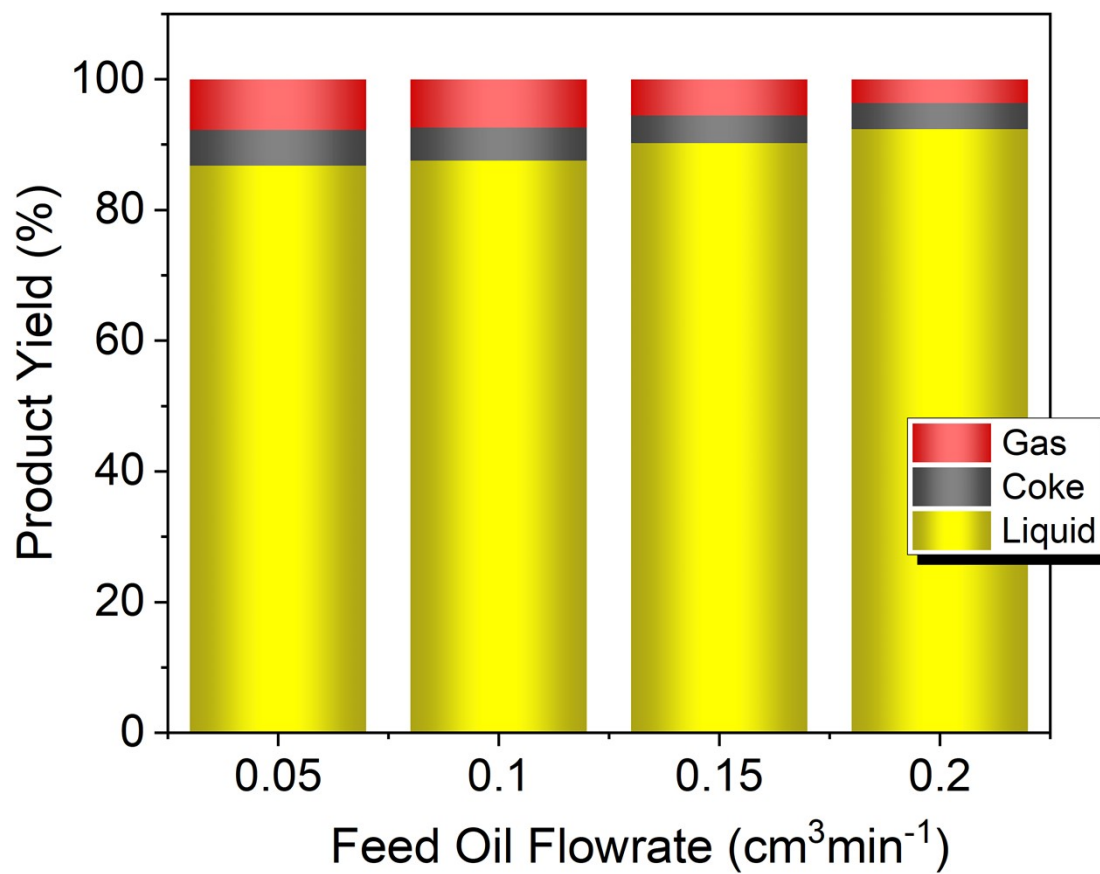

**Fig.S5.** Effects of feed oil flowrates on the product yields.

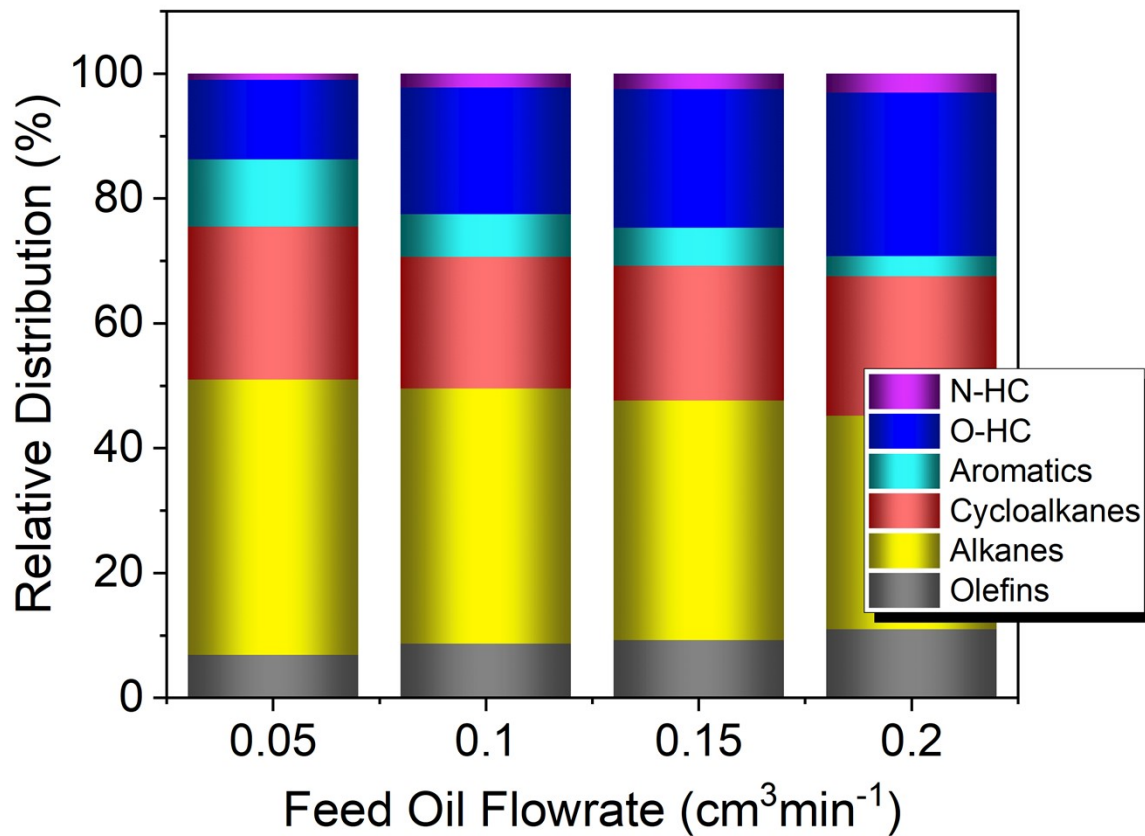

**Fig.S6.** Effects of feed oil flowrates on the relative distribution of products.

**Table S3.** Comparison of upgrading heavy hydrocarbons to jet fuel range hydrocarbons between thermal catalytic processes and this work.

| Feedstock   | Catalyst                         | Gas            | Reactor                                | Reaction conditions |         |       |                      | Oil yield (%) | Remark                                                                                                                                                                                                                                                                                                                                                                                                                                                                          | Ref. |
|-------------|----------------------------------|----------------|----------------------------------------|---------------------|---------|-------|----------------------|---------------|---------------------------------------------------------------------------------------------------------------------------------------------------------------------------------------------------------------------------------------------------------------------------------------------------------------------------------------------------------------------------------------------------------------------------------------------------------------------------------|------|
|             |                                  |                |                                        | T (°C)              | P (bar) | T (h) | W <sub>cat</sub> (g) |               |                                                                                                                                                                                                                                                                                                                                                                                                                                                                                 |      |
| Guaiacol    | Pd <sub>2%</sub> /H <sub>β</sub> | H <sub>2</sub> | Batch                                  | 220                 | 30      | 4     | 0.03                 | 77.66         | <ul style="list-style-type: none"> <li>- At a low reaction temperature of 160 °C, the predominant hydrocarbon product was cyclohexane.</li> <li>- When the H<sub>2</sub> pressure was set at 5 and 10 bar, the conversion of guaiacol was merely 2.96% and 8.04%, respectively. This indicates that a high-pressure environment was essential to facilitate the generation of active hydrogen required for breaking the C-O bonds in the hydrodeoxygenation process.</li> </ul> | 1    |
| α-tetralone | Pd-Ni/SBA-16                     | H <sub>2</sub> | Continuous fixed-bed down-flow reactor | 400                 | 1       | 12    | 0.06                 | 88.21         | <ul style="list-style-type: none"> <li>- The catalytic activity of Pd-Ni impregnated on various supports, including different mesoporous materials (MCM-41, SBA-15, KIT-6) and metal oxides</li> </ul>                                                                                                                                                                                                                                                                          | 2    |

|            |                                       |                |                            |     |    |   |      |      |  |                                                                                                                                                                                                                                                                                                                                                                                                                                                                                                                                                                                                      |
|------------|---------------------------------------|----------------|----------------------------|-----|----|---|------|------|--|------------------------------------------------------------------------------------------------------------------------------------------------------------------------------------------------------------------------------------------------------------------------------------------------------------------------------------------------------------------------------------------------------------------------------------------------------------------------------------------------------------------------------------------------------------------------------------------------------|
|            |                                       |                |                            |     |    |   |      |      |  | <p>(<math>\gamma</math>-Al<sub>2</sub>O<sub>3</sub>, CeO<sub>2</sub>, TiO<sub>2</sub>, ZrO<sub>2</sub>, SiO<sub>2</sub>), was compared with that of Pd-Ni/SBA-16.</p> <p>- The observed catalytic activity exhibited the following order: SBA-16 &gt; KIT-6 &gt; SBA-15 &gt; MCM-41 &gt; <math>\gamma</math>-Al<sub>2</sub>O<sub>3</sub> &gt; SiO<sub>2</sub> &gt; CeO<sub>2</sub> &gt; TiO<sub>2</sub> &gt; ZrO<sub>2</sub>.</p> <p>- Mesoporous materials with high surface area, thermal stability, and evenly dispersed metals displayed higher catalytic activity compared to metal oxides.</p> |
| Isoeugenol | Pt (4 wt%)-<br>Re (4 wt%)/<br>Sibunit | H <sub>2</sub> | Batch (thermal<br>reactor) | 250 | 30 | 4 | 0.05 | 84.0 |  | <p>- The two primary products were 2-methoxy-4-propylcyclohexanol, obtained through the hydrogenation of the aromatic ring, and propylcyclohexane (the desired product), resulting from both the hydrogenation of the aromatic ring and complete deoxygenation.</p> <p>- The monometallic Pt catalyst exhibited low activity. However, the</p>                                                                                                                                                                                                                                                       |

|                   |                                                   |                                         |                                   |     |     |   |     |     |                                                                                                                                                                                                                                                                                                                                                            |   |
|-------------------|---------------------------------------------------|-----------------------------------------|-----------------------------------|-----|-----|---|-----|-----|------------------------------------------------------------------------------------------------------------------------------------------------------------------------------------------------------------------------------------------------------------------------------------------------------------------------------------------------------------|---|
|                   |                                                   |                                         |                                   |     |     |   |     |     | incorporation of Re (rhenium) to create a bi-metallic catalyst (Pt-Re/Sibunit) had a significant impact on hydrodeoxygenation activity. In this case, $\text{ReO}_x$ introduced oxygen vacancies crucial for the deoxygenation process.                                                                                                                    |   |
| Cyclohexanone     | Sulfided CoMo/ $\gamma$ - $\text{Al}_2\text{O}_3$ | $\text{N}_2$ and $\text{H}_2$ (50%–50%) | Continuous-fixed-bed flow reactor | 350 | 8   | 6 | 2   | n.a | <ul style="list-style-type: none"> <li>- Elevated pressures within the investigated range of 8–20 bar were found to enhance selectivity towards deoxygenated products, such as benzene and cyclohexene.</li> <li>- Concurrently, an overall conversion improvement from 7% to 18% was observed as the temperature increased from 300 to 350 °C.</li> </ul> | 4 |
| Waste cooking oil | $\text{ZnAl}_2\text{O}_4$                         | $\text{H}_2$                            | Batch reactor                     | 450 | 120 | 1 | n/a | 80  | <ul style="list-style-type: none"> <li>- Elevated pressures within the investigated range of 8–20 bar was found to enhance selectivity towards deoxygenated products, such as benzene and cyclohexene.</li> <li>- Concurrently, an overall conversion improvement</li> </ul>                                                                               | 5 |

|                         |                                 |                |                               |     |    |    |     |      |  |                                                                                                                                                                                                                                                                                                                                                                                                                                                                                                                                                                                                                                                                                                                               |
|-------------------------|---------------------------------|----------------|-------------------------------|-----|----|----|-----|------|--|-------------------------------------------------------------------------------------------------------------------------------------------------------------------------------------------------------------------------------------------------------------------------------------------------------------------------------------------------------------------------------------------------------------------------------------------------------------------------------------------------------------------------------------------------------------------------------------------------------------------------------------------------------------------------------------------------------------------------------|
|                         |                                 |                |                               |     |    |    |     |      |  | from 7% to 18% was observed as the temperature increased from 300 to 350 °C.                                                                                                                                                                                                                                                                                                                                                                                                                                                                                                                                                                                                                                                  |
| Phenol + benzyl acetate | 5 wt.% Pd/C and Montmorillonite | H <sub>2</sub> | Batch-autoclave reactor (MMT) | 180 | 60 | 10 | 2.3 | 75.2 |  | <ul style="list-style-type: none"> <li>- Benzylphenols were synthesized through the alkylation of phenol and benzyl acetate utilizing an MMT catalyst. Hydrodeoxygenation of the alkylation products was performed over a Pd/C catalyst to yield hydrocarbons within the jet fuel range.</li> <li>-The primary alkylation products were identified as 2-benzylphenol and 4-benzylphenol, achieving a 70% yield at 140°C with a reaction time of 2h.</li> <li>- Reducing the reaction temperature from 220 to 180 °C led to an increase in the yield of perhydrofluorene (from 34.36% to 75.20%). In contrast, the yield of dicyclohexylmethane decreased (from 50.96% to 10.42%). This change is attributed to the</li> </ul> |

6

|          |                                                                                             |                |                                       |     |    |   |   |     |                                                                                                                                                                                                                                                                                                                                                                                                                                                                                                                         |
|----------|---------------------------------------------------------------------------------------------|----------------|---------------------------------------|-----|----|---|---|-----|-------------------------------------------------------------------------------------------------------------------------------------------------------------------------------------------------------------------------------------------------------------------------------------------------------------------------------------------------------------------------------------------------------------------------------------------------------------------------------------------------------------------------|
|          |                                                                                             |                |                                       |     |    |   |   |     | saturation of two benzene rings in 2-benzylphenol and 4-benzylphenol through simultaneous hydrogenation at the higher reaction temperature, thereby suppressing the intramolecular alkylation reaction.                                                                                                                                                                                                                                                                                                                 |
| Propanal | Cu/SiO <sub>2</sub> -TiO <sub>2</sub> (upstream catalyst)<br>Ni/ZSM-5 (downstream catalyst) | H <sub>2</sub> | Continuous dual-bed fixed-bed reactor | 300 | 10 | 5 | 2 | n.a | <p>- A dual-bed reactor was employed as a strategic solution to tackle challenges associated with the hydrodeoxygenation of small oxygenates, wherein they undergo hydrogenation to produce light hydrocarbons. The dual-bed catalyst demonstrated significantly higher efficacy, resulting in an 81.7% yield of jet fuel range hydrocarbons compared to the single-bed counterpart (Cu/SiO<sub>2</sub>-TiO<sub>2</sub>) with a yield of 12.3%.</p> <p>- In the dual-bed setup, propanal initially engaged with the</p> |



|                               |               |                 |                                  |     |   |    |     |      |                                                                                                                                                                                                                                                                                                                                                                                                                                            |           |
|-------------------------------|---------------|-----------------|----------------------------------|-----|---|----|-----|------|--------------------------------------------------------------------------------------------------------------------------------------------------------------------------------------------------------------------------------------------------------------------------------------------------------------------------------------------------------------------------------------------------------------------------------------------|-----------|
|                               |               |                 |                                  |     |   |    |     |      | upstream catalyst (Cu/SiO <sub>2</sub> -TiO <sub>2</sub> ), leading to enhanced chain growth, predominantly yielding C <sub>9</sub> ketone.                                                                                                                                                                                                                                                                                                |           |
|                               |               |                 |                                  |     |   |    |     |      | -This configuration effectively curtailed side reactions, particularly the generation of olefins via the direct dehydration of propanal, when compared to the Ni/HZSM-5 catalyst.                                                                                                                                                                                                                                                          |           |
| Biomass-derived pyrolysis oil | 0.1wt% Ir/GaN | CH <sub>4</sub> | Continuous fluidized bed reactor | 100 | 1 | 24 | 0.1 | 87.0 | - Showcase of an efficient H <sub>2</sub> -free pyrolysis oil upgrading process using a triphase plasma catalytic system.<br>- Impressive oil yields reaching nearly 87%, with density and viscosity meeting ASTM standards.<br>- Product distribution, including alkanes, cycloalkanes, and aromatics, aligns with commercial jet fuel requirements.<br>- Achieved under mild operating conditions: temperatures around 100°C and ambient | This work |

---

pressure.

---

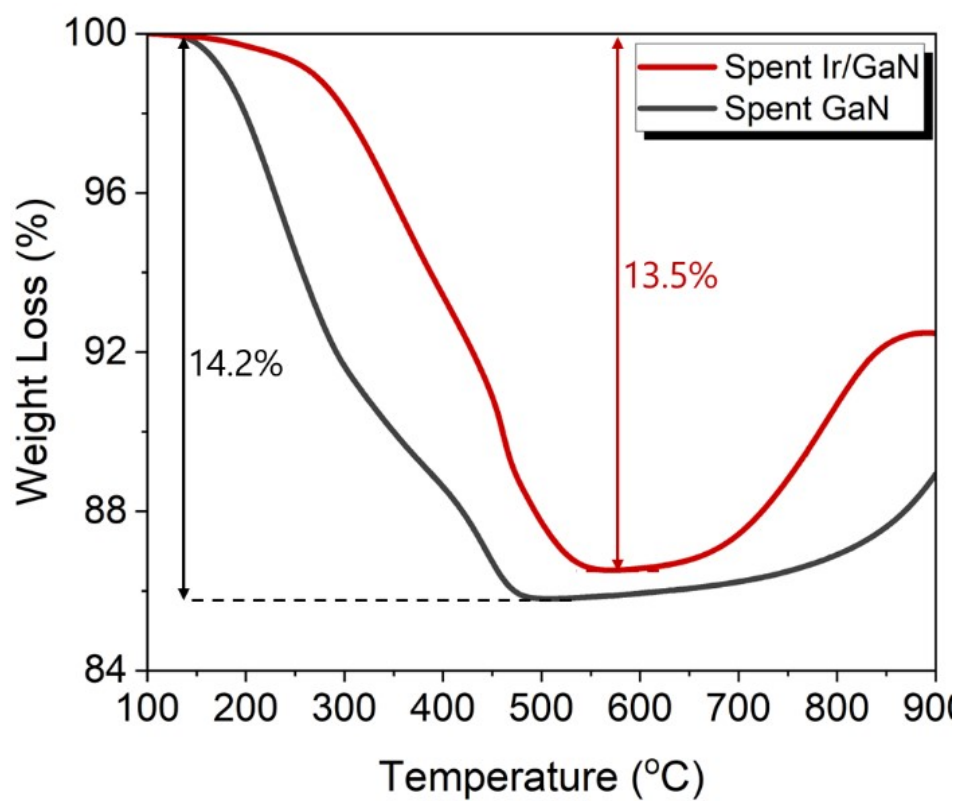

**Fig.S7.** TGA profile of spent GaN and Ir/GaN catalysts.

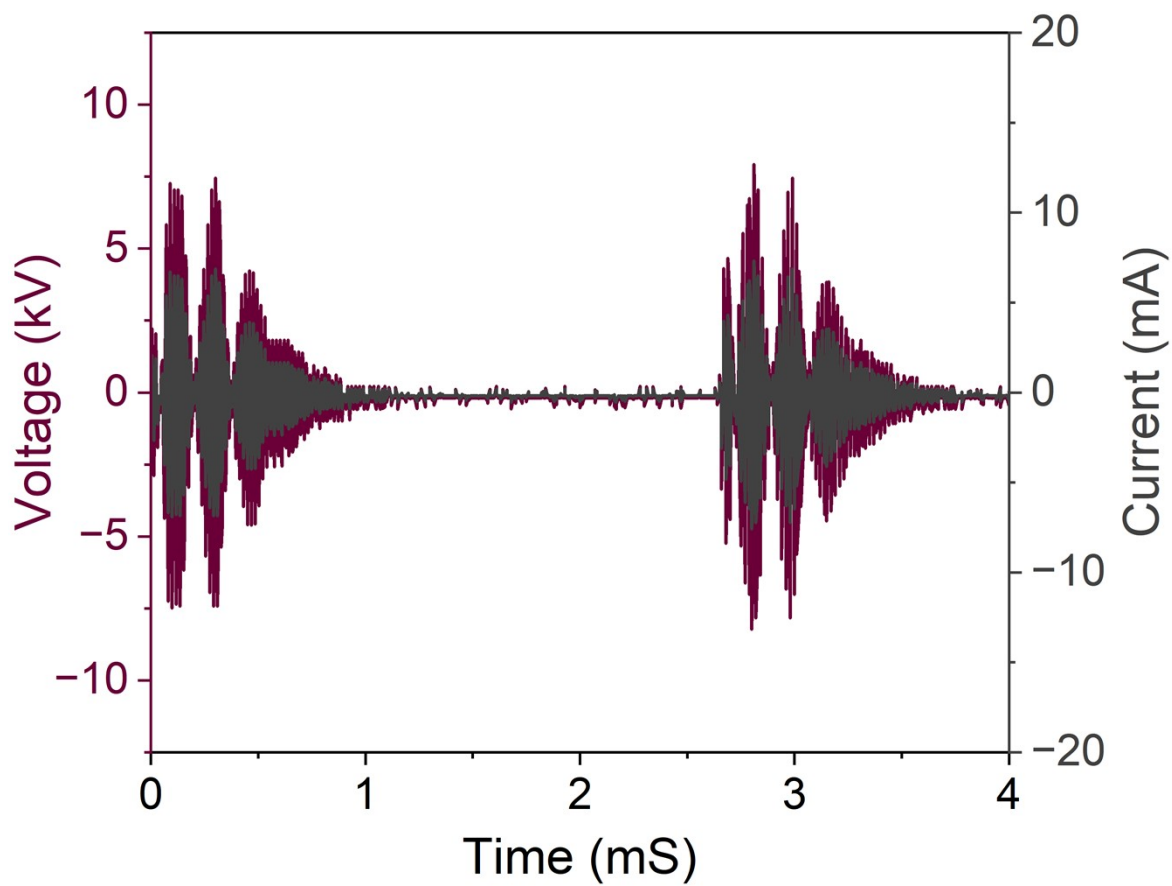

**Fig. S8.** Voltage-Current profile of plasma discharge inside triphase pyrolysis oil upgrading.

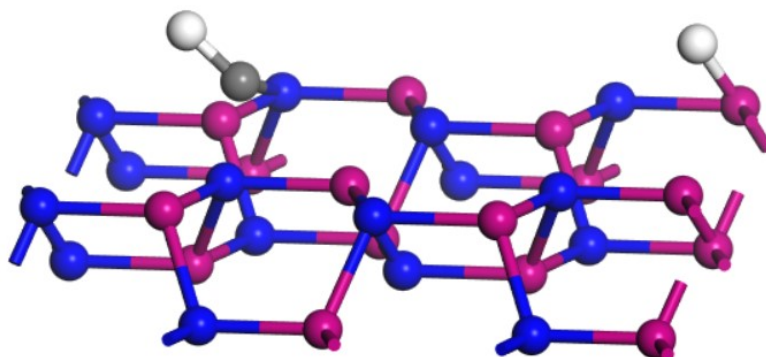

**Fig. S9.** Possible structure and adsorption of CH and H species on the GaN (110) surface.

**Table S4.** Adsorption energy diagram for CH<sub>4</sub> dissociation on the GaN (110) and Ir (100) under plasma regime.

| Reaction steps                         | Adsorption energy (eV) |       |
|----------------------------------------|------------------------|-------|
|                                        | GaN                    | Ir    |
| CH <sub>4</sub>                        | -0.23                  | -0.06 |
| CH <sub>4</sub> → CH <sub>3</sub> + H  | -0.41                  | -0.24 |
| CH <sub>4</sub> → CH <sub>2</sub> + 2H | -0.5                   | -0.3  |
| CH <sub>4</sub> → CH + 3H              | -0.54                  | -0.36 |
| CH <sub>4</sub> → C + 4H               | -0.64                  | -0.42 |

## References

1. L. Hu, X.-Y. Wei, M.-L. Xu, Y.-H. Kang, X.-H. Guo, F.-B. Zhang, Z.-M. Zong and H.-C. Bai, *J. Environ. Chem. Eng*, 2021, **9**, 106599.
2. G. Vijayakumar and A. Pandurangan, *Energy*, 2017, **140**, 1158-1172.
3. M. E. Martínez-Klimov, P. Mäki-Arvela, Z. Vajglova, M. Alda-Onggar, I. Angervo, N. Kumar, K. Eränen, M. Peurla, M. H. Calimli, J. Muller, A. Shchukarev, I. L. Simakova and D. Y. Murzin, *Energy Fuels*, 2021, **35**, 17755-17768.
4. M. Saidi and A. Jahangiri, *Chem. Eng. Res. Des.*, 2017, **121**, 393-406.
5. R. El-Araby, E. Abdelkader, G. El Diwani and S. I. Hawash, *Bull. Natl. Res. Cent* . 2020, **44**, 177.
6. J. Bai, Y. Zhang, X. Zhang, C. Wang and L. Ma, *ACS Sustain. Chem. Eng.*, 2021, **9**, 7112-7119.
7. I. Yeboah, X. Feng, G. Wang, K. R. Rout, Z. Cai, X. Duan, X. Zhou and D. Chen, *ACS Sustain. Chem. Eng.*, 2020, **8**, 9434-9446.
